# Supplementary material
Source: Springer Nature journal article supplement (https://www.springermedizin.de/resource/supplementary/13046_2009_242_MOESM3_ESM.pdf/9661622)
Supplement: MOESM3 [file 9661622]

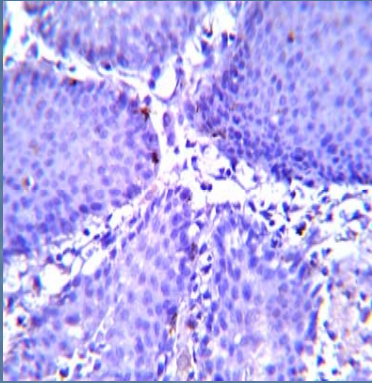

normal saline group :  
immunohistochemistry DAB  $\times 400$

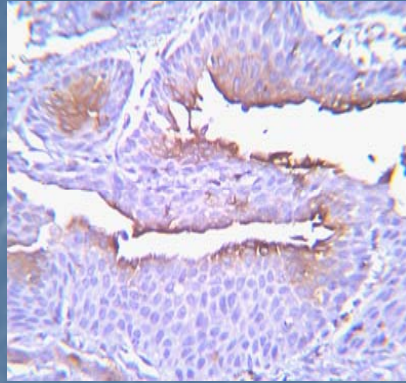

empty plasmid baby  
Bifidobacterium  
group :  
immunohistochemistry DAB  $\times 400$

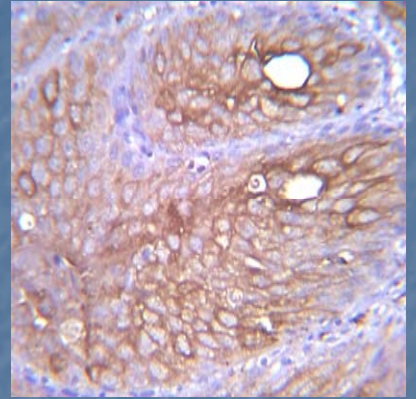

Recombinant  
Plasmid baby  
Bifidobacterium  
group:  
immunohistochemistry DAB  $\times 400$
